# Supplementary material for: Improved community detection in weighted bipartite networks
Source: PubMed Central journal article supplement (PMC4736915; doi:10.1098/rsos.140536), 2016-01-20
Supplement: rsos140536supp1.pdf [file rsos140536supp1.pdf]

# Supporting Information: Improved community detection in weighted bipartite networks

Stephen Beckett

Biosciences, College of Life and Environmental Sciences, University of Exeter, EX4 4QE

Current address: School of Biology, Georgia Institute of Technology, Atlanta, Georgia, USA

## Contents

|   |                                                                    |   |
|---|--------------------------------------------------------------------|---|
| 1 | Synthetic Networks                                                 | 2 |
| 2 | Plant-pollinator datasets                                          | 4 |
| 3 | Details for viewing plant-pollinator partitions                    | 6 |
| 4 | Extra results from algorithm analysis on plant-pollinator datasets | 7 |

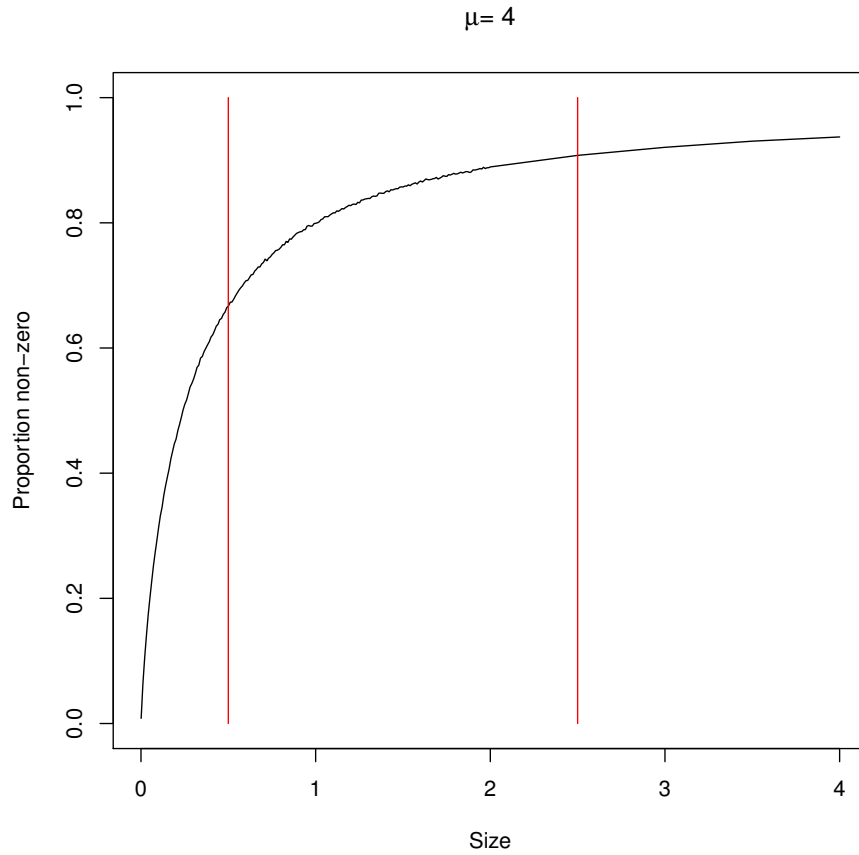

Figure 1: Proportion of 10,000 numbers drawn from negative binomial distributions with a mean of 4 that were not equal to zero.

## 1 Synthetic Networks

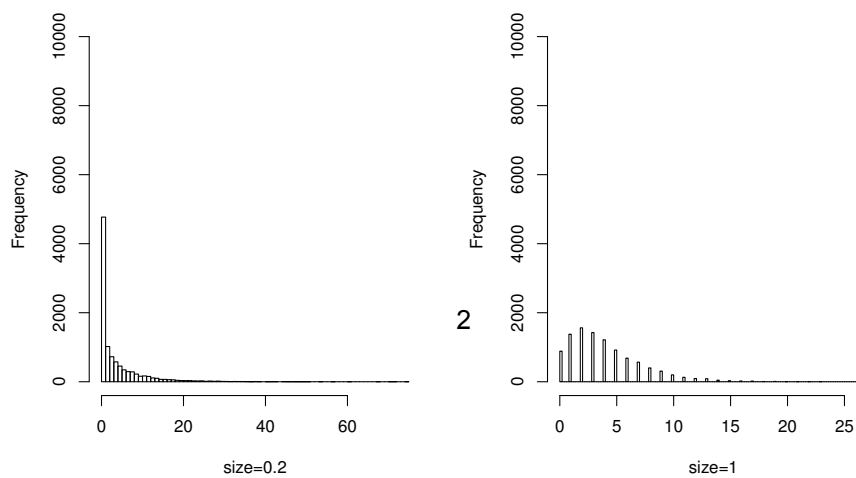

Figure 2: Histograms of 10,000 draws from the two negative binomial distribu-

The results from the synthetic ensemble are saved in the folder paper/paper-code/syntheticEnsemble.RData in the supporting data repository [1].

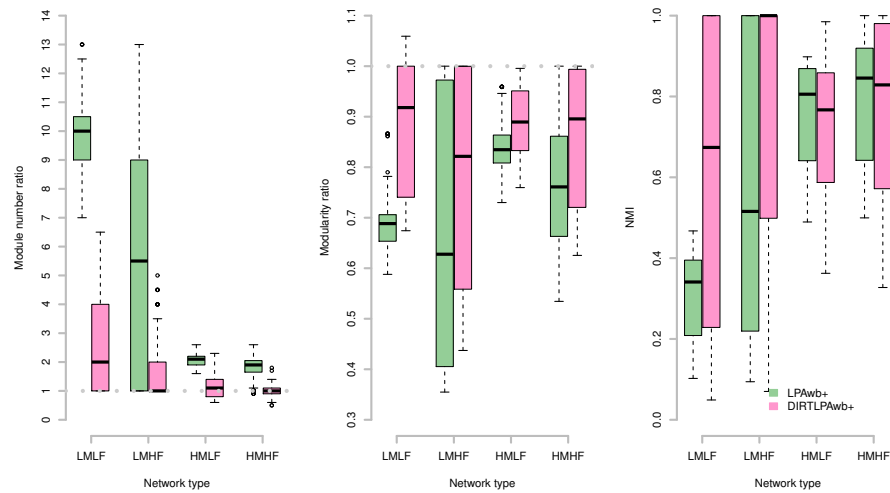

Figure 3: Evaluation of the LPAwb+ and DIRTLPAbw+ algorithms against synthetically generated weighted networks with known modular structure for four different treatments: LMLF – 2 modules and low connectance (dispersion parameter given as  $size = 0.5$ ), LMHF – 2 modules, higher connectance (dispersion parameter given as  $size = 2.5$ ), HMLF – 10 modules, lower connectance, HMHF – 10 modules, higher connectance. (a) shows the ratio of detected modules to known modules, (b) shows the ratio of detected modularity ( $Q_w$ ) to the modularity of the implanted structure. The dotted lines represent the ability to perfectly detect the synthetic community partitions. Finally (c) shows the normalised mutual information (NMI) between detected community structure and the embedded community structure.

## 2 Plant-pollinator datasets

| Network             | Rows | Columns | Edges | Fill  | Reference |
|---------------------|------|---------|-------|-------|-----------|
| Safariland          | 9    | 27      | 39    | 1130  | [2, 3, 4] |
| barrett1987         | 12   | 102     | 167   | 550   | [5]       |
| bezerra2009         | 13   | 13      | 71    | 28224 | [6]       |
| elberling1999       | 23   | 118     | 238   | 383   | [7]       |
| inouye1988          | 41   | 83      | 268   | 1459  | [8]       |
| junker2013          | 56   | 257     | 572   | 3053  | [9]       |
| kato1990            | 91   | 679     | 1206  | 2392  | [10]      |
| kevan1970           | 30   | 114     | 312   | 2523  | [11]      |
| memmott1999         | 25   | 79      | 299   | 2183  | [12]      |
| mosquin1967         | 11   | 18      | 38    | 134   | [13]      |
| motten1982          | 13   | 44      | 143   | 2225  | [14]      |
| olesen2002aigrettes | 14   | 13      | 52    | 1512  | [15]      |
| olesen2002flores    | 10   | 12      | 30    | 1139  | [15]      |
| ollerton2003        | 9    | 56      | 103   | 594   | [16]      |
| schemske1978        | 7    | 32      | 59    | 299   | [17]      |
| small1976           | 13   | 34      | 141   | 992   | [18]      |
| vazarr              | 10   | 29      | 43    | 515   | [2, 3, 4] |
| vazcer              | 9    | 33      | 45    | 613   | [2, 3, 4] |
| vazillao            | 10   | 29      | 42    | 677   | [2, 3, 4] |
| vazmasc             | 8    | 26      | 36    | 286   | [2, 3, 4] |
| vazmasnc            | 8    | 35      | 51    | 719   | [2, 3, 4] |
| vazquec             | 8    | 27      | 47    | 592   | [2, 3, 4] |
| vazquenc            | 7    | 24      | 31    | 761   | [2, 3, 4] |

Table 1: Network properties of the datasets used in this study.

### 3 Details for viewing plant-pollinator partitions

The modular partitions found for each plant-pollinator network for both binary and quantitative cases are described in the supporting data repository [1].

They can be found by navigating to `paper/papercode/output/configurations`

Each file in this folder is of a given format:

First the network name is given

Second a letter B or Q details whether this is a binary or quantitative network partition

Next are two sets of two letters, which together describe the two algorithms being compared (LP: LPAwb+, EX: DIRTLPAwb+, QB: QuanBiMo)

Then the final string of important characters again identifies whether it is binary or quantitative and the corresponding algorithm the partition was found by. If this string is preceded by either min or max - this means that multiple network configurations were found with the highest modularity score detected by one of the two competing algorithms (see column U in tables S2-S3). min and max correspond to partitions that either minimised or maximised the NMI score between the solutions each algorithm identified. If neither min or max are listed there is no range of NMI values – as identified in Table 3 in the main text.

Within each file the list of all row and column nodes is given at depth 0, whilst at depth 1 the modular configurations the nodes are assigned to is listed.

#### 4 Extra results from algorithm analysis on plant-pollinator datasets

| Network             | QuanBiMo |             |     |     | LPAwb+ |     |             |     | Exhaustive LPAwb+ |        |     |             |     |     |        |
|---------------------|----------|-------------|-----|-----|--------|-----|-------------|-----|-------------------|--------|-----|-------------|-----|-----|--------|
|                     | $R$      | $\tilde{x}$ | $U$ | $F$ | $Q'_R$ | $R$ | $\tilde{x}$ | $U$ | $F$               | $Q'_R$ | $R$ | $\tilde{x}$ | $U$ | $F$ | $Q'_R$ |
| Safariland          | 89       | 0.558       | 1   | 0   | 0.538  | 100 | 0.519       | 2   | 0                 | 0.385  | 46  | 0.554       | 1   | 0   | 0.538  |
| barrett1987         | 1        | 0.106       | 1   | 0   | 0.521  | 95  | 0.470       | 1   | 0                 | 0.246  | 4   | 0.480       | 1   | 0   | 0.317  |
| bezerra2009         | 76       | 0.230       | 1   | 0   | 0.155  | 100 | 0.218       | 1   | 0                 | -0.099 | 34  | 0.229       | 1   | 0   | 0.155  |
| elberling1999       | 1        | 0.144       | 1   | 6   | 0.395  | 100 | 0.458       | 2   | 0                 | 0.008  | 1   | 0.483       | 1   | 0   | 0.193  |
| inouye1988          | 1        | 0.389       | 1   | 0   | 0.194  | 55  | 0.351       | 1   | 0                 | -0.179 | 1   | 0.403       | 1   | 0   | 0.209  |
| junker2013          | 1        | 0.021       | 1   | 0   | 0.570  | 62  | 0.433       | 33  | 0                 | -0.091 | 1   | 0.480       | 1   | 0   | 0.119  |
| kato1990            | 1        | 0.006       | 1   | 0   | 0.945  | 98  | 0.544       | 90  | 0                 | 0.154  | 1   | 0.573       | 1   | 0   | -0.987 |
| kevan1970           | 1        | 0.309       | 1   | 1   | 0.301  | 8   | 0.341       | 3   | 0                 | -0.205 | 1   | 0.423       | 1   | 0   | 0.276  |
| memmott1999         | 1        | 0.295       | 1   | 0   | 0.171  | 60  | 0.268       | 8   | 0                 | -0.344 | 1   | 0.329       | 1   | 0   | 0.097  |
| mosquin1967         | 58       | 0.479       | 1   | 0   | 0.368  | 100 | 0.393       | 1   | 0                 | -0.053 | 42  | 0.472       | 1   | 0   | 0.368  |
| motten1982          | 3        | 0.304       | 1   | 0   | -0.049 | 100 | 0.281       | 1   | 0                 | -0.259 | 3   | 0.303       | 1   | 0   | -0.049 |
| olesen2002aigrettes | 21       | 0.334       | 1   | 0   | 0.269  | 95  | 0.314       | 1   | 0                 | 0.000  | 75  | 0.340       | 1   | 0   | 0.269  |
| olesen2002flores    | 25       | 0.441       | 1   | 0   | 0.467  | 95  | 0.422       | 2   | 0                 | 0.133  | 44  | 0.441       | 1   | 0   | 0.467  |
| ollerton2003        | 5        | 0.318       | 1   | 2   | 0.223  | 39  | 0.439       | 1   | 0                 | 0.165  | 5   | 0.439       | 1   | 0   | 0.223  |
| schemske1978        | 54       | 0.370       | 1   | 0   | 0.119  | 100 | 0.370       | 1   | 0                 | 0.119  | 100 | 0.370       | 1   | 0   | 0.119  |
| small1976           | 5        | 0.255       | 1   | 0   | 0.007  | 99  | 0.242       | 1   | 0                 | -0.234 | 8   | 0.260       | 1   | 0   | 0.007  |
| vazarr              | 100      | 0.542       | 1   | 0   | 0.535  | 100 | 0.512       | 1   | 0                 | 0.395  | 13  | 0.535       | 1   | 0   | 0.535  |
| vazcer              | 29       | 0.547       | 1   | 0   | 0.644  | 100 | 0.565       | 1   | 0                 | 0.467  | 75  | 0.619       | 1   | 0   | 0.644  |
| vazliao             | 100      | 0.576       | 1   | 0   | 0.619  | 78  | 0.550       | 2   | 0                 | 0.524  | 27  | 0.570       | 1   | 0   | 0.619  |
| vazmasc             | 100      | 0.547       | 2   | 0   | 0.556  | 100 | 0.522       | 1   | 0                 | 0.444  | 56  | 0.547       | 2   | 0   | 0.556  |
| vazmasnc            | 10       | 0.526       | 1   | 0   | 0.451  | 100 | 0.512       | 2   | 0                 | 0.373  | 20  | 0.522       | 1   | 0   | 0.451  |
| vazquec             | 26       | 0.488       | 1   | 0   | 0.532  | 100 | 0.474       | 1   | 0                 | 0.234  | 77  | 0.497       | 1   | 0   | 0.532  |
| vazquenc            | 100      | 0.549       | 1   | 0   | 0.677  | 100 | 0.514       | 1   | 0                 | 0.548  | 78  | 0.549       | 1   | 0   | 0.677  |

Table 2: Extra results from the evaluations of the binary version of these networks.  $R$  is the number of times that the best partitions (with highest  $Q_B$ ) were found from the 100 tests,  $\tilde{x}$  is the median  $Q_B$  score,  $U$  is the number of unique configurations found with the maximum  $Q_B$  score (for each method) judged by comparing the normalised mutual information of partitions sharing this value,  $F$  is number of times that the algorithms reported a failure (from the 100 runs) and  $Q'_R$  is the realised modularity of the partition with highest  $Q_B$  score (for each method). Numbers have been rounded to 3 d.p.



| Network             | QuanBiMo |           |     |     | LPAwb+ |     |           |     | Exhaustive LPAwb+ |        |     |           |     |     |        |
|---------------------|----------|-----------|-----|-----|--------|-----|-----------|-----|-------------------|--------|-----|-----------|-----|-----|--------|
|                     | $R$      | $\hat{x}$ | $U$ | $F$ | $Q'_R$ | $R$ | $\hat{x}$ | $U$ | $F$               | $Q'_R$ | $R$ | $\hat{x}$ | $U$ | $F$ | $Q'_R$ |
| Safariland          | 75       | 0.430     | 1   | 0   | 0.979  | 100 | 0.427     | 1   | 0                 | 0.963  | 35  | 0.430     | 1   | 0   | 0.979  |
| barrett1987         | 1        | 0.047     | 1   | 0   | 0.844  | 100 | 0.567     | 1   | 0                 | 0.560  | 3   | 0.568     | 1   | 0   | 0.535  |
| bezerra2009         | 22       | 0.222     | 1   | 0   | -0.139 | 100 | 0.223     | 1   | 0                 | -0.139 | 100 | 0.223     | 1   | 0   | -0.139 |
| elberling1999       | 1        | 0.134     | 1   | 3   | 0.436  | 100 | 0.493     | 4   | 0                 | 0.180  | 1   | 0.506     | 1   | 0   | 0.269  |
| inouye1988          | 1        | 0.481     | 1   | 0   | 0.589  | 100 | 0.582     | 1   | 0                 | 0.406  | 1   | 0.608     | 1   | 0   | 0.582  |
| junker2013          | 1        | 0.008     | 1   | 0   | 0.597  | 100 | 0.533     | 1   | 0                 | 0.452  | 1   | 0.558     | 1   | 0   | 0.588  |
| kato1990            | 1        | 0.004     | 1   | 0   | 0.896  | 100 | 0.611     | 1   | 0                 | 0.355  | 1   | 0.620     | 1   | 0   | -0.967 |
| kevan1970           | 1        | 0.241     | 1   | 0   | 0.559  | 100 | 0.525     | 1   | 0                 | 0.583  | 5   | 0.535     | 1   | 0   | 0.675  |
| memmott1999         | 1        | 0.123     | 1   | 0   | 0.407  | 100 | 0.297     | 1   | 0                 | 0.132  | 2   | 0.304     | 1   | 0   | 0.306  |
| mosquin1967         | 73       | 0.444     | 1   | 0   | 0.478  | 100 | 0.440     | 1   | 0                 | 0.403  | 60  | 0.444     | 1   | 0   | 0.478  |
| motten1982          | 12       | 0.354     | 1   | 0   | 0.355  | 100 | 0.367     | 1   | 0                 | 0.212  | 97  | 0.382     | 1   | 0   | 0.355  |
| olesen2002aigrettes | 91       | 0.259     | 1   | 0   | 0.148  | 100 | 0.259     | 1   | 0                 | 0.148  | 100 | 0.259     | 1   | 0   | 0.148  |
| olesen2002flores    | 72       | 0.497     | 1   | 0   | 0.403  | 100 | 0.497     | 1   | 0                 | 0.403  | 100 | 0.497     | 1   | 0   | 0.403  |
| ollerton2003        | 1        | 0.153     | 1   | 0   | 0.498  | 100 | 0.395     | 1   | 0                 | 0.431  | 88  | 0.413     | 1   | 0   | 0.498  |
| schemske1978        | 1        | 0.238     | 1   | 0   | 0.378  | 100 | 0.320     | 1   | 0                 | 0.378  | 100 | 0.320     | 1   | 0   | 0.378  |
| small1976           | 35       | 0.526     | 1   | 0   | 0.381  | 100 | 0.516     | 1   | 0                 | 0.260  | 1   | 0.516     | 1   | 0   | 0.387  |
| vazarr              | 22       | 0.428     | 1   | 0   | 0.456  | 100 | 0.441     | 1   | 0                 | 0.449  | 60  | 0.442     | 1   | 0   | 0.456  |
| vazcer              | 31       | 0.481     | 1   | 0   | 0.869  | 100 | 0.591     | 1   | 0                 | 0.830  | 60  | 0.604     | 1   | 0   | 0.869  |
| vazliao             | 100      | 0.561     | 1   | 0   | 0.625  | 100 | 0.558     | 1   | 0                 | 0.586  | 34  | 0.561     | 1   | 0   | 0.625  |
| vazmasc             | 27       | 0.656     | 1   | 0   | 0.769  | 100 | 0.655     | 1   | 0                 | 0.727  | 62  | 0.663     | 1   | 0   | 0.769  |
| vazmasnc            | 25       | 0.201     | 1   | 0   | 0.499  | 100 | 0.400     | 1   | 0                 | 0.497  | 20  | 0.400     | 1   | 0   | 0.499  |
| vazquec             | 56       | 0.511     | 1   | 0   | 0.581  | 100 | 0.504     | 1   | 0                 | 0.544  | 14  | 0.504     | 1   | 0   | 0.581  |
| vazquenc            | 100      | 0.450     | 1   | 0   | 0.963  | 100 | 0.450     | 1   | 0                 | 0.963  | 100 | 0.450     | 1   | 0   | 0.963  |

Table 3: Extra results from the evaluations of the weighted version of these networks.  $R$  is the number of times that the best partitions (with highest  $Q_W$ ) were found from the 100 tests,  $\hat{x}$  is the median  $Q_W$  score,  $U$  is the number of unique configurations found with the maximum  $Q_W$  score (for each method) judged by comparing the normalised mutual information of partitions sharing this value,  $F$  is number of times that the algorithms reported a failure (from the 100 runs) and  $Q'_R$  is the realised modularity of the partition with highest  $Q_W$  score (for each method). Numbers have been rounded to 3 d.p.

## References

- [1] S. J. Beckett, “weighted-modularity-LPAwbPLUS: Improved community detection in weighted bipartite networks,” p. 10.5281/zenodo.34055, 2015.
- [2] D. P. Vázquez and D. Simberloff, “Ecological specialization and susceptibility to disturbance: conjectures and refutations,” *The American Naturalist*, vol. 159, no. 6, pp. 606–623, 2002.
- [3] D. P. Vázquez, Interactions among introduced ungulates, plants, and pollinators: a field study in the temperate forest of the southern Andes. PhD thesis, University of Tennessee, Knoxville, Tennessee, USA., 2002.
- [4] D. P. Vázquez and D. Simberloff, “Changes in interaction biodiversity induced by an introduced ungulate,” *Ecology Letters*, vol. 6, no. 12, pp. 1077–1083, 2003.
- [5] S. C. Barrett and K. Helenurm, “The reproductive biology of boreal forest herbs. i. breeding systems and pollination,” *Canadian Journal of Botany*, vol. 65, no. 10, pp. 2036–2046, 1987.
- [6] E. L. Bezerra, I. C. Machado, and M. A. Mello, “Pollination networks of oil-flowers: a tiny world within the smallest of all worlds,” *Journal of Animal Ecology*, vol. 78, no. 5, pp. 1096–1101, 2009.
- [7] H. Elberling and J. M. Olesen, “The structure of a high latitude plant-flower visitor system: the dominance of flies,” *Ecography*, vol. 22, no. 3, pp. 314–323, 1999.
- [8] D. W. Inouye and G. H. Pyke, “Pollination biology in the snowy mountains of australia: comparisons with montane colorado, usa,” *Australian Journal of Ecology*, vol. 13, no. 2, pp. 191–205, 1988.
- [9] R. R. Junker, N. Blüthgen, T. Brehm, J. Binkenstein, J. Paulus, H. Martin Schaefer, and M. Stang, “Specialization on traits as basis for the niche-breadth of flower visitors and as structuring mechanism of ecological networks,” *Functional Ecology*, vol. 27, no. 2, pp. 329–341, 2013.
- [10] M. Kato, T. Kakutani, T. Inoue, and T. Itino, “Insect-flower relationship in the primary beech forest of ashu, kyoto: an overview of the flowering phenology and the seasonal pattern of insect visits,” *Contributions from the Biological Laboratory, Kyoto University*, 1990.
- [11] P. Kevan, “High arctic insect-flower visitor relations: the inter-relationships of arthropods and flowers at lake hazen, ellesmere island, northwest territories, canada,” PhD thesis, 1970.
- [12] J. Memmott, “The structure of a plant-pollinator food web,” *Ecology Letters*, vol. 2, no. 5, pp. 276–280, 1999.

- [13] T. Mosquin and J. Martin, "Observations on the pollination biology of plants on melville island, nwt, canada," *Canadian Field Naturalist*, vol. 81, pp. 201–205, 1967.
- [14] A. F. Motten, "Pollination ecology of the spring wildflower community of a temperate deciduous forest," *Ecological Monographs*, pp. 21–42, 1986.
- [15] J. M. Olesen, L. I. Eskildsen, and S. Venkatasamy, "Invasion of pollination networks on oceanic islands: importance of invader complexes and endemic super generalists," *Diversity and Distributions*, vol. 8, no. 3, pp. 181–192, 2002.
- [16] J. Ollerton, S. D. Johnson, L. Cranmer, and S. Kellie, "The pollination ecology of an assemblage of grassland asclepiads in south africa," *Annals of Botany*, vol. 92, no. 6, pp. 807–834, 2003.
- [17] D. W. Schemske, M. F. Willson, M. N. Melampy, L. J. Miller, L. Verner, K. M. Schemske, and L. B. Best, "Flowering ecology of some spring woodland herbs," *Ecology*, pp. 351–366, 1978.
- [18] E. Small, "Insect pollinators of the mer bleue peat bog of ottawa," *Canadian field-naturalist*, 1976.
